# Supplementary material
Source: publisher figshare collection journal article supplement (https://acs.figshare.com/ndownloader/files/4232563)
Supplement: Supplementary file 1 [file 4232563]

# Supporting Information

## *Mode-Specific Chemisorption of CH<sub>4</sub> on Pt{110}-(1×2) Explored by First-Principles Molecular Dynamics*

*M. Sacchi<sup>\*</sup>, D. J. Wales and S. J. Jenkins*

Department of Chemistry, University of Cambridge, Lensfield Road, Cambridge, CB2 1EW, UK

Email: ms857@cam.ac.uk

### **Appendix I**

The symmetrised internal coordinates described in Section 3.3 do not provide a perfectly accurate representation of the normal modes of the isolated methane molecule because the  $\nu_3$  and  $\nu_4$  modes, belonging to the  $T_2$  representation, cannot be described as neither pure stretching or bending modes, but are instead a combination of bond elongations ( $S_{3x}$ ,  $S_{3y}$ ,  $S_{3z}$ ) and angular deformations ( $S_{4x}$ ,  $S_{4y}$ ,  $S_{4z}$ ). Symmetrised coordinates have the advantage of being represented by simple linear combinations of either bond elongations or angle deformations, but, even in the simple quadratic force-field approximation, the use of this set of coordinates implies the presence of cross terms (with the associated force constant  $F_{34}$ ) in the expression describing the quadratic potential:<sup>1</sup>

$$2V = F_{11}S_1^2 + F_{22}(S_{2a}^2 + S_{2b}^2) + F_{33}(S_{3x}^2 + S_{3y}^2 + S_{3z}^2) + F_{44}(S_{4x}^2 + S_{4y}^2 + S_{4z}^2) + 2F_{34}(S_{3x}S_{4x} + S_{3y}S_{4y} + S_{3z}S_{4z})$$

In this study, we have transformed the symmetrised  $S$  coordinates (eq 1) into normal mode coordinates by diagonalization of the force constant matrix associated with nuclear motion along  $S_3$  and  $S_4$ .<sup>1</sup> Since the off-diagonal terms in the force constant matrix are relatively small, only a minor correction to the expression of  $S_3$  and  $S_4$  coordinates is needed to transform them into genuine normal mode coordinates ( $Q$ ):  $Q_{3i} = aS_{3i} + bS_{4i}$  and  $Q_{4i} = aS_{4i} + bS_{3i}$ , where  $i = x, y, z$  ( $a = 0.997595$ ,  $b = 0.069318$ ), while the normal mode coordinates for  $\nu_1$  and  $\nu_2$  are unchanged ( $Q_1 = S_1, Q_2 = S_2$ ).

The vibrational force constants ( $F_{11}$ ,  $F_{22}$ ,  $F_{33}$ ,  $F_{34}$  and  $F_{44}$ ) associated with each mode have been calculated from the vibrational frequencies obtained by normal mode analysis for the isolated methane molecule, following the procedure described by Jones and Goldblatt.<sup>2</sup> Transformation into normal coordinates eliminates the cross term  $F_{34}$  and the remaining force constants have the values indicated in Table S1.

**Table S1.** Force constants associated with CH<sub>4</sub> normal modes (J/m<sup>2</sup>).

|            |                       |
|------------|-----------------------|
| $F(\nu_1)$ | $5.34083 \times 10^2$ |
| $F(\nu_2)$ | $0.44139 \times 10^2$ |
| $F(\nu_3)$ | $5.40695 \times 10^2$ |
| $F(\nu_4)$ | $0.39237 \times 10^2$ |

## REFERENCES

- (1) Raynes, W. T.; Lazzeretti, P.; Zanasi, R.; Sadlej, A. J.; Fowler, P. W. *Molecular Physics* **1987**, *60*, 509 - 525.
- (2) Jones, L. H.; Goldblatt, M. *Journal Of Molecular Spectroscopy* **1958**, *2*, 103-112.
